# Supplementary material for: Qiangji Jianli Decoction Alleviates Hydrogen Peroxide‐Induced Mitochondrial Dysfunction via Regulating Mitochondrial Dynamics and Biogenesis in L6 Myoblasts
Source: Hindawi journal article supplement (doi:10.1155/2021/6660616), 2021-01-01
Supplement: f1 [file 6660616.f1.pdf]

Table S1: SD rats for QJLD-containing serum preparation.

| Group             | number | average weight (g) | Treatment              |
|-------------------|--------|--------------------|------------------------|
| normal group      | 7      | 236.04±5.57        | equal volume of liquid |
| Low-dose group    | 7      | 234.69±4.08        | 5.85g/kg·d QJLD        |
| Middle-dose group | 7      | 234.73±6.70        | 11.70 g/kg·d QJLD      |
| High-dose group   | 7      | 236.63±5.64        | 23.40g/kg·d QJLD       |

Data were expressed as Mean ± SD (n=7). Before QJLD-containing serum preparation, the average weight of 28 SD rats is 235.52±5.32g, and there is no statistical significance of the average weight among the four groups.
